# Supplementary material for: Improving solubility and avoiding hygroscopicity of tetrahydroberberine by forming hydrochloride salts by introducing solvents: [HTHB]Cl, [HTHB]Cl·CH3OH and [HTHB]Cl·CH3COOH
Source: Royal Society of Chemistry journal article supplement (doi:10.1039/c7nj02423a), 2017-01-01
Supplement: c7nj02423a1.pdf [file c7nj02423a1.pdf]

*Electronic Supplementary Information*

**For**

**Improving solubility and avoiding hygroscopicity of tetrahydroberberine by forming  
hydrochloride salt by introducing solvents: [HTHB]Cl, [HTHB]Cl·CH<sub>3</sub>OH and  
[HTHB]Cl·CH<sub>3</sub>COOH**

Yunan Zhang<sup>a</sup>, Dajun Zhang<sup>a</sup>, Yu Zhang<sup>a,\*</sup>, Lixin Liu<sup>a</sup>, Xuesong Zhang<sup>b</sup>, Lei Zhang<sup>a</sup>, Yunjie Zhang<sup>a</sup>,  
Liang Chang<sup>a</sup>, Qiushuang Fan<sup>a</sup>, Yongbiao Zhang<sup>a</sup>, Jiaming Xi<sup>a</sup>, Qiang Zhang<sup>c</sup>

<sup>a</sup> College of Pharmacy, Jiamusi University, Jiamusi, Heilongjiang 154007, China

<sup>b</sup> First Affiliated Hospital, Jiamusi University, Jiamus, Heilongjiang 154007, China

<sup>c</sup> School of Public Health, Jiamusi University, Jiamusi, Heilongjiang 154007, China

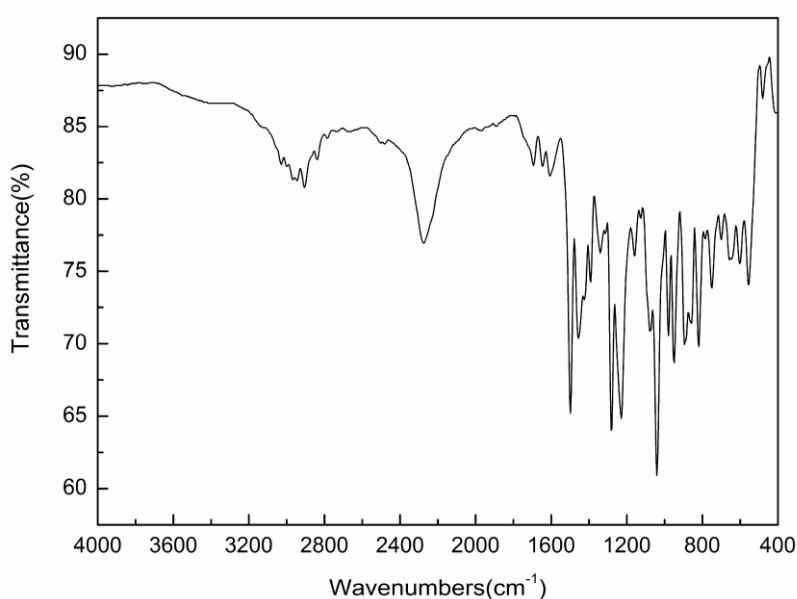

**Fig. S1.** IR spectra of compound 1.

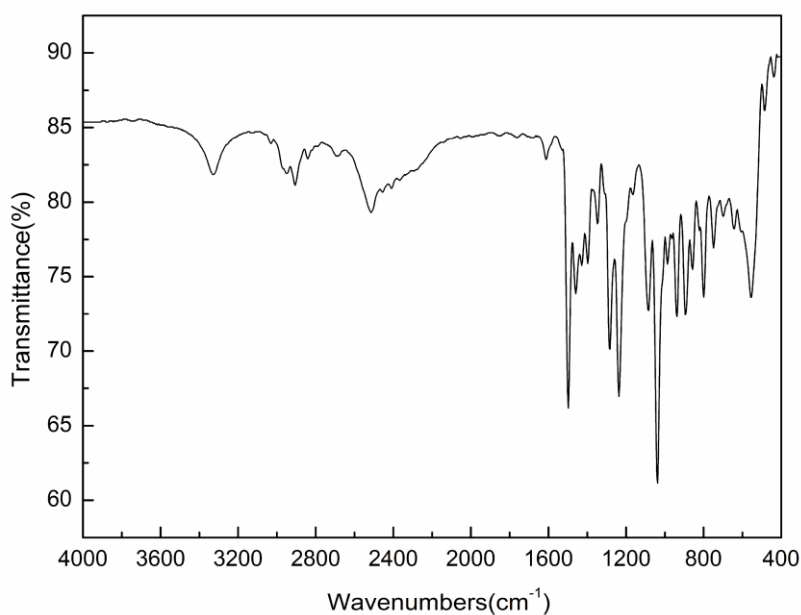

**Fig. S2.** IR spectra of compound 2.

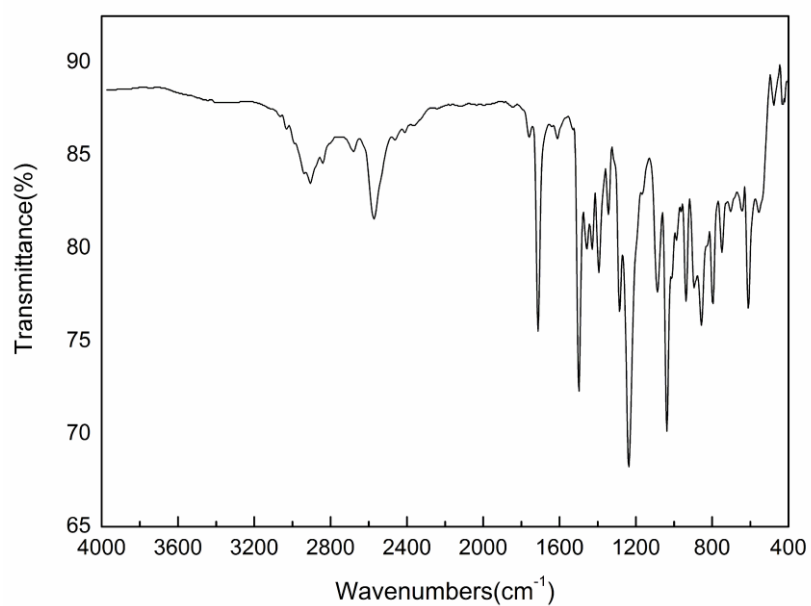

**Fig. S3.** IR spectra of compound **3**.

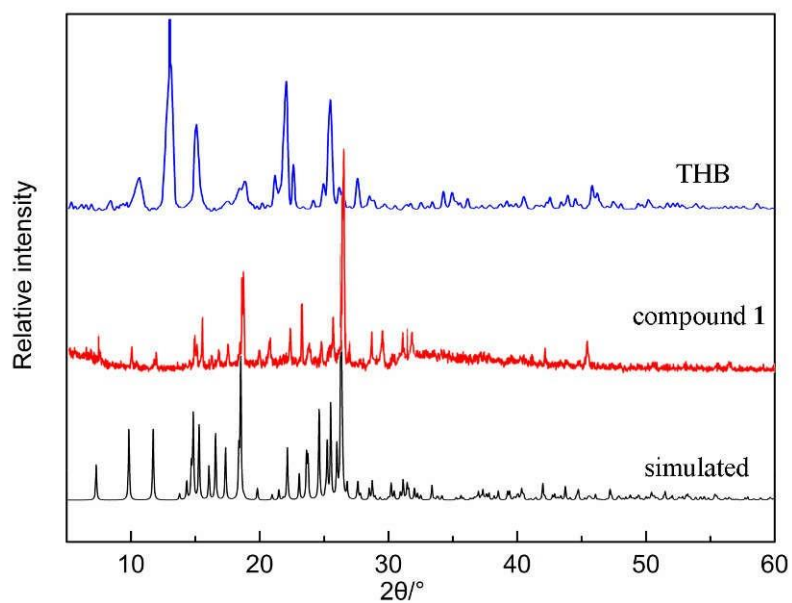

**Fig. S4.** Comparison of XRPD patterns: experimental XRPD patterns of THB, experimental XRPD patterns of **1** and the simulated patterns of **1**.

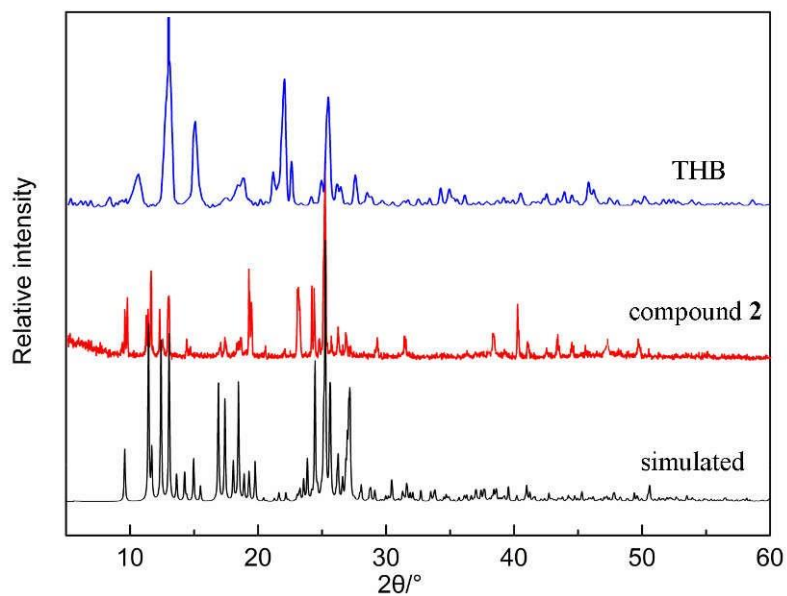

**Fig. S5.** Comparison of XRPD patterns: experimental XRPD patterns of THB, experimental XRPD patterns of **2** and the simulated patterns of **2**.

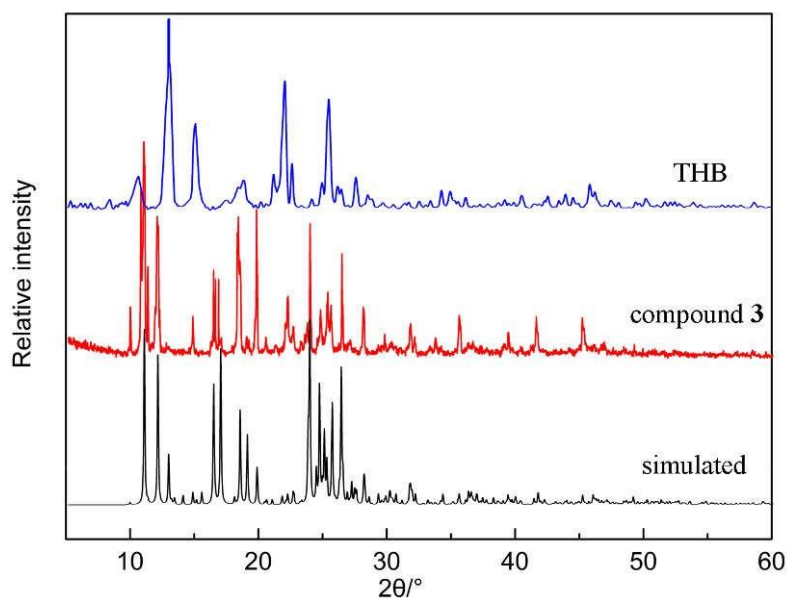

**Fig. S6.** Comparison of XRPD patterns: experimental XRPD patterns of THB, experimental XRPD patterns of **3** and the simulated patterns of **3**.

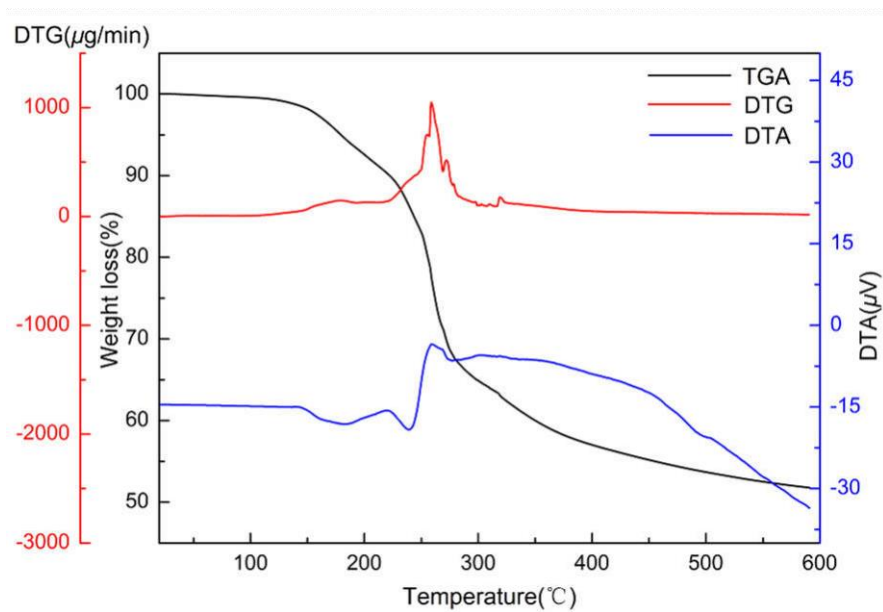

**Fig. S7.** TGA/DTG and DTA curves of compound **1**.

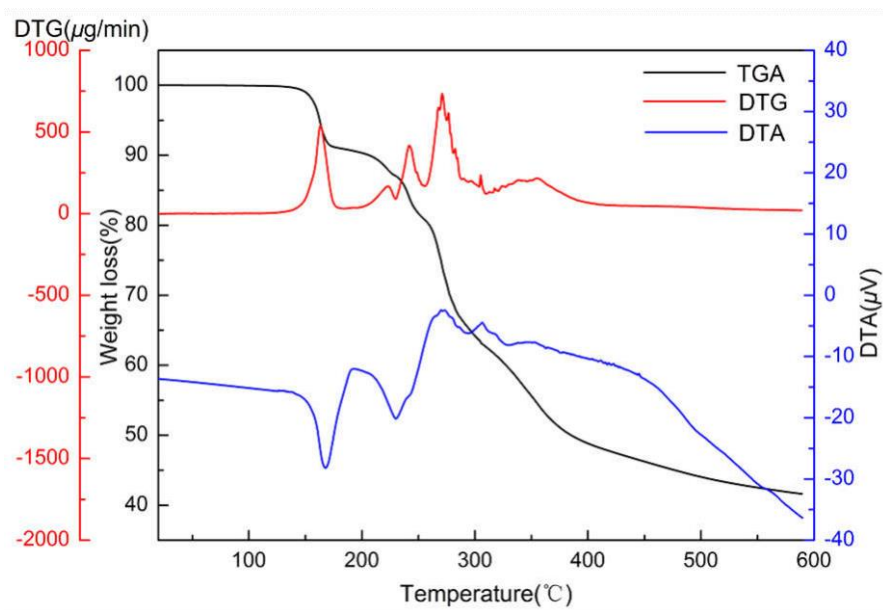

**Fig. S8.** TGA/DTG and DTA curves of compound **2**.

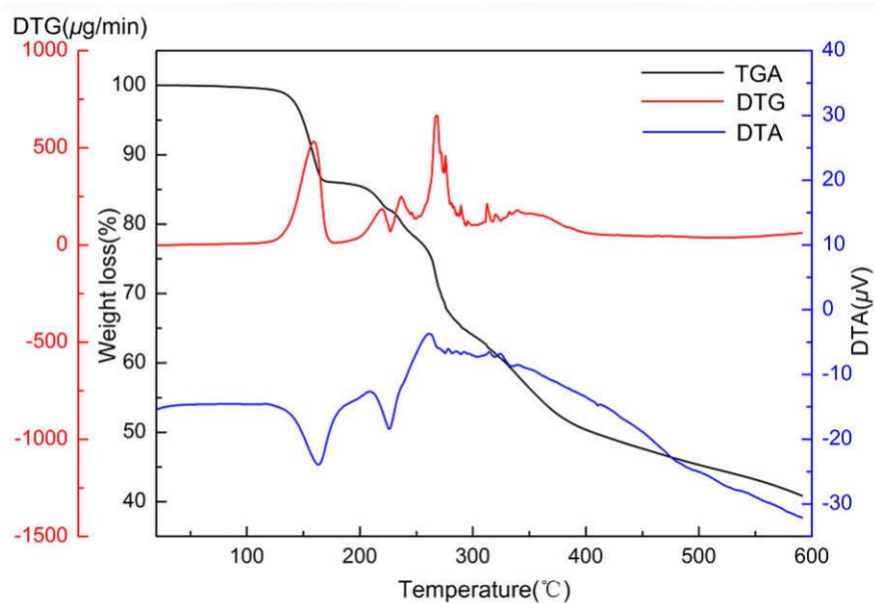

**Fig. S9.** TGA/DTG and DTA curves of compound **3**.

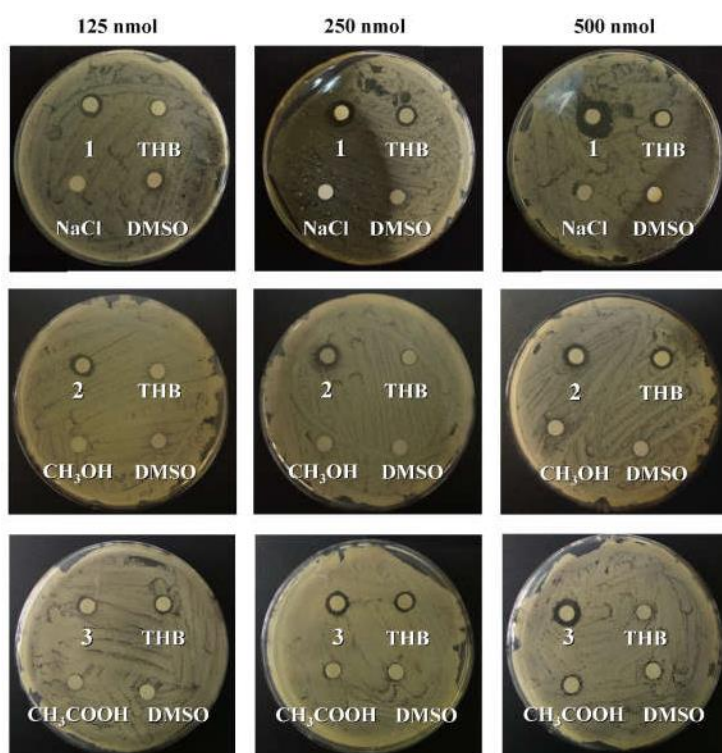

**Fig. S10.** Results of inhibitory zones of compounds **1-3** on *S. aureus*.

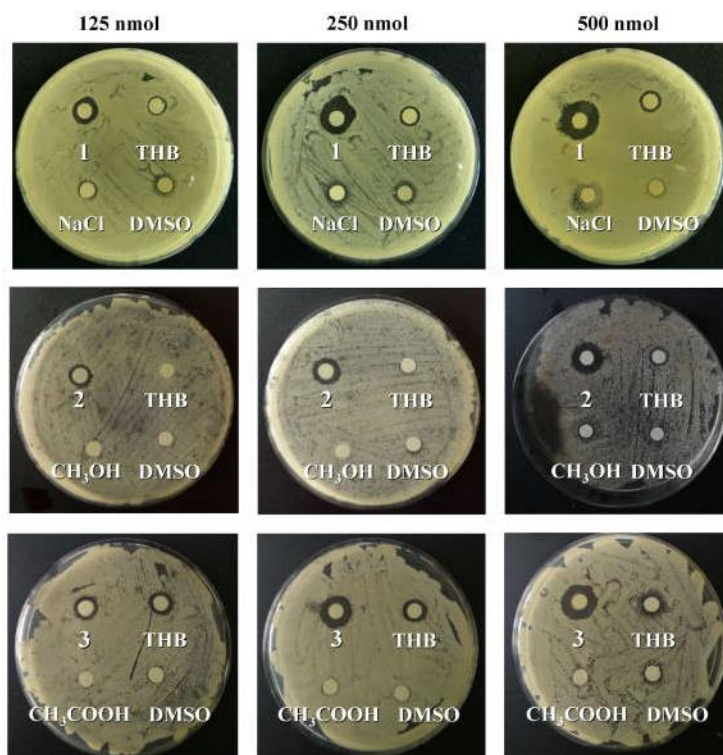

**Fig. S11.** Results of inhibitory zones of compounds **1-3** on *E. coli*.
